# Supplementary material
Source: publisher site journal article supplement (https://www.dovepress.com/article/396746)
Supplement: Supplementary file 1 [file get_supplementary_file.php]

**Supplementary Material**

Solid-phase extraction method

In order to compare with the extraction of docetaxel liposomes by TiO2, SPE method was used to measure the extraction recovery of total and liposomal-encapsulated drugs of QC samples.

Protein precipitation extraction (PPE) was utilized for the total DTX extraction. Briefly, Briefly, 50 μL plasma samples were followed by protein precipitation with 150 μL of MeOH. After vortex-mixing for 2 min and centrifugation at 15,000 g for 10 min, supernatant was evaporated to dryness and redissolved with 50 μL of 70:30 Acetonitrle : water (0.1% FA). The re-dissolved solution was then injected onto the LC-MS/MS system for analysis.

A combination of SPE and PPE extractions were utilized for encapsulated DTX method. Briefly, 150 μL of plasma samples were mixed with 150 μL PBS. The fully mixed plasma samples were then loaded on a pre-conditioned Waters Oasis HLB 96-well plate (30 μm, 10 mg). free DTX retained on reversed phase cartridges whereas liposomal-encapsulated was not because of the hydrophilic surface of liposomes. The breakthrough eluent was collected into a clean 96-well plate. From this breakthrough eluent, 45 μL was transferred to a clean round-well 96-well plate and 5 μL of IS was added. These samples were then extracted by PPE with 150 μL of MeOH. After vortex-mixing for 2 min and centrifugation at 15,000 g for 10 min, supernatant was evaporated to dryness and redissolved with 50 μL of 70:30 Acetonitrle : water (0.1% FA). The re-dissolved solution was then injected onto the LC-MS/MS system for analysis.

The extraction recovery was evaluated at low, medium and high QC concentration levels. The extraction recovery was evaluated by calculating the peak areas of test samples spiked with analyte and IS before versus after extraction. The extraction recovery for encapsulated DTX was 70.2-72.43% (Table S1).

Table S1 Extraction recovery for liposomal-encapsulated DTX in rat plasma (*n* = 5 per assay).

| Liposomal-encapsulated DTX | Extraction Recovery (%) |
| --- | --- |
| LQC (40 ng/mL) | 72.43±2.60 |
| MQC (300 ng/mL) | 71.09±1.25 |
| HQC (3000 ng/mL) | 70.20±0.13 |
